# Supplementary material
Source: HighWire-hosted journal article supplement (https://www.qdcxjkg.com/highwire/filestream/113137/field_highwire_adjunct_files/0/ERJ_9_1579.pdf)
Supplement: ERJ_9_1579.pdf [file ERJ_9_1579.pdf]

# CORRIGENDUM

"Nucleotide-induced mucin release from primary hamster tracheal surface epithelial cells involves the P<sub>2u</sub> purinoceptor". K.C. Cim, H.R. Park, C.Y. Shin, T. Akiyama, K.H. Ko. *Eur Respir J* 1996; 9: 542-548.

The authors wish to correct the legend to figure 5, and apologise for the oversight. "MUC1 mucin gene" should read "P<sub>2u</sub> gene" and "MUC1 cDNAs" should read "P<sub>2u</sub> cDNAs".

|                       |                                                           |      |
|-----------------------|-----------------------------------------------------------|------|
| Human P <sub>2u</sub> | GGGCCAAGCGCAAGTCCGTGCGCACCATCGCCGTTGGTGTCTGGCTGTCTTCGCCCT | 1009 |
|                       |                                                           |      |
| Mouse P <sub>2u</sub> | GGGCCAAGCGCAAGTCTGTGCGCACCATTGCCTTGGTACTGGCCGTCTTCGCCCT   | 1036 |
| Upstream primer       | TGTACGAACCATCGCCCTGGTGTCTGGCCGTCTTTACCT                   |      |
| Hamster               | CTGCTTCCTGCCATTCCACGTACCCGCACCCTCTACTACTCCTTCCGCTCGCTG    | 1064 |
|                       |                                                           |      |
|                       | CTGCTTTCTGCCTTTCCACGTACCGCGCACCCTCTACTACTCCTTCCGATCACTT   | 1091 |
|                       |                                                           |      |
|                       | CTGCTTCCTGCCCTTCCACGTACCCGCACCCTCTACTACTCCTTTCGATCTCT     |      |
|                       |                                                           |      |
|                       | GACCTCAGCTGCCACACCCCAACGCCATCAACATGGCCACAAGGTTACCCG..     | 1117 |
|                       |                                                           |      |
|                       | GACCTCAGCTGCCACACCCCAACGCCATCAACATGGCATATAAGATCACCCGGC    | 1146 |
|                       |                                                           |      |
|                       | GACCTCAGTTGCCACACCCCAACGCCATCAACATGGCGTACAAGATCACAGGC     |      |
|                       |                                                           |      |
|                       | .GCTGGCCAGTGCTAACAGTTGCCTTGACCCGTGCTCTACTTCTGGCTGGGCA     | 1171 |
|                       |                                                           |      |
|                       | CGCTGGCCAGCGCCAACAGTTGTCTTGACCCGGTACTCTACTTCTGGCAGGGCA    | 1201 |
|                       |                                                           |      |
|                       | CACTGGCCAGCGCCAACAGTTGTCTTGATCCTGTGCTCTACTTCTGGCAGGGCA    |      |
|                       |                                                           |      |
|                       | GAGGCTCGTACGCTTTGCCCGAGATGCCAAGCCACCACCTGGCCCCAGCCCTGCC   | 1226 |
|                       |                                                           |      |
|                       | GAGACTTGTCCGCTTTGCCCGAGATGCCAAGCCACCACGGAGCCTACCCCCAGC    | 1256 |
|                       |                                                           |      |
|                       | GAGACTCGTCCGGTTTGCCCGAGACGCCAAGCCACCACAGAGCCAGCCCCAGG     |      |
|                       |                                                           |      |
|                       | ACCCCGGCTCGCCGCACGCTGGGCCGTGCGCAGATCCGACAGAACTGACATGCAGA  | 1281 |
|                       |                                                           |      |
|                       | CCACAGGCTCGTCGCAAGCTGGGCCGTGACAGGCCAACAGAACTGTGAGGAA..    | 1309 |
|                       |                                                           |      |
|                       | CCCAGGCTCATCGCAGGCTGGGCCGTGACAGGTCTCACAGGACTGACACTGTGA    |      |
|                       |                                                           |      |
|                       | GGATAGGAGATGTGTTGGGCAGCAGTGAGGACTCTAGGCGGACAGAGTCCACGCC   | 1336 |
|                       |                                                           |      |
|                       | .....AGATTTGTCAGTCAGCAGTGACGACTCAAGACGGACAGAGTCCACACC     | 1357 |
|                       |                                                           |      |
|                       | GGA...AAGATGTGTCGGTTCAGCAGTGATGACTCCAGACGGACAGAGTCCACACC  |      |
|                       |                                                           |      |
|                       | GGCTGGTAGCGAGAACAATAAGGACATTCGGCTGTAGGAGCAGAACAC          | 1384 |
|                       |                                                           |      |
|                       | AGCTGGAAGTGAGA...CTAAGGACATTCGGCTATAG.....CAC             | 1394 |
|                       |                                                           |      |
|                       | AGCTGGGAACGACA...                                         |      |
|                       |                                                           |      |
|                       | Downstream primer                                         |      |

Corrected legend. Fig. 5. - Partial nucleotide sequence of hamster P<sub>2u</sub> gene and the comparison of the sequence with those of human and mouse P<sub>2u</sub> gene. Total RNAs from confluent HTSE cells were subjected to RT-PCR using two primers (underlined) which contain exactly homologous sequences between the human [17] and mouse [18] P<sub>2u</sub> cDNAs. A resulting PCR product (0.4 kb) was then subjected to nucleotide sequencing as described in Methods. Note that there is a great sequence homology among the three species. RT-PCR: reverse transcriptase-polymerase chain reaction; RNA: ribonucleic acid. For further abbreviations see legend to figure 4.
